# Supplementary material for: Oral Microbiota—A New Frontier in the Pathogenesis and Management of Head and Neck Cancers
Source: MDPI journal article supplement (doi:10.3390/cancers14010046), 2021-12-23
Supplement: s1 [file s1]

# Supplementary Materials: Oral Microbiota—A New Frontier in the Pathogenesis and Management of Head and Neck Cancers

Marjut Metsäniitty, Shrabon Hasnat, Tuula Salo and Abdelhakim Salem

**Table S1.** The inclusion and exclusion criteria applied in this study.

| Inclusion criteria                                                                                                         | Exclusion criteria                                                                                                                                                   |
|----------------------------------------------------------------------------------------------------------------------------|----------------------------------------------------------------------------------------------------------------------------------------------------------------------|
| <ul style="list-style-type: none"> <li>Original research studies</li> </ul>                                                | <ul style="list-style-type: none"> <li>The retrieved records were</li> <li>Reviews</li> <li>Case reports</li> <li>Letters</li> <li>Conference proceedings</li> </ul> |
| <ul style="list-style-type: none"> <li>Studies must be fully in English</li> </ul>                                         | <ul style="list-style-type: none"> <li>Studies in other languages</li> </ul>                                                                                         |
| <ul style="list-style-type: none"> <li>Studies are performed on humans</li> </ul>                                          | <ul style="list-style-type: none"> <li>Studies not including human samples</li> </ul>                                                                                |
| <ul style="list-style-type: none"> <li>Studies on patients diagnosed with head and neck squamous cell carcinoma</li> </ul> | <ul style="list-style-type: none"> <li>Studies with other cancer types</li> </ul>                                                                                    |
| <ul style="list-style-type: none"> <li>Studies on oral microbiota</li> </ul>                                               | <ul style="list-style-type: none"> <li>Studies on non-oral microbiota</li> </ul>                                                                                     |

**Table S2.** Evaluation criteria used to assess the reporting quality of the included studies.

| Checklist Items                 | Criteria <sup>†</sup>                                                                                                                                                                                                                                                                                                 |
|---------------------------------|-----------------------------------------------------------------------------------------------------------------------------------------------------------------------------------------------------------------------------------------------------------------------------------------------------------------------|
| 1. Patient samples              | Cohort (retrospective or prospective) study with a well-defined study population including detailed information such as the number of cases, source, study and follow-up periods. Authors explained the treatment(s) applied to the patients and clarified if all of the patients received the same treatment or not. |
| 2. Clinical data                | The clinical data were provided including gender, age, clinical stage and histopathological grade of the tumour.                                                                                                                                                                                                      |
| 3. Immunohistochemistry         | Well-described staining protocol or at least referred to original publication(s) with clear information including antibody name, dilution, company. The cutoff value of the stained area was adequately described.                                                                                                    |
| 4. Prognostics                  | The clinical endpoints of the survival analyses were precisely defined (e.g., overall survival, disease-free survival etc.).                                                                                                                                                                                          |
| 5. Statistics                   | Estimated effects (HR, CI) were describing the relationship between the evaluated oral microbiota and the outcome was provided. Adequate statistical analysis (e.g., Cox regression modelling) was performed.                                                                                                         |
| 6. Classical prognostic factors | The relationship between the evaluated oral microbiota and other classical prognostic factors were reported.                                                                                                                                                                                                          |

HR, hazard ratio; CI, confidence intervals. <sup>†</sup> Adapted from the Reporting Recommendations for Tumor Marker Prognostic Studies (REMARK) guidelines.

**Table S3.** The risk of bias and reporting quality of the included studies.

| Study | Q1. | Q2. | Q3. | Q4. | Q5 | Q6. | Q7. | Q8. | Q9. | Q10. | % *  | Risk of bias | Compliance to REMARK criteria |
|-------|-----|-----|-----|-----|----|-----|-----|-----|-----|------|------|--------------|-------------------------------|
| [18]  | Y   | Y   | Y   | N   | N  | Y   | N   | NA  | Y   | Y    | 66.6 | Moderate     | None                          |
| [44]  | N   | Y   | Y   | N   | N  | N   | N   | NA  | Y   | Y    | 44.4 | High         | 1,3                           |
| [19]  | N   | Y   | Y   | N   | N  | Y   | N   | NA  | Y   | N    | 44.4 | High         | 1                             |
| [20]  | N   | Y   | Y   | N   | N  | N   | N   | NA  | Y   | Y    | 44.4 | High         | 1                             |
| [41]  | Y   | Y   | Y   | Y   | N  | Y   | Y   | NA  | Y   | Y    | 88.8 | Low          | 1,2                           |
| [21]  | Y   | Y   | Y   | Y   | Y  | Y   | N   | NA  | Y   | N    | 77.7 | Low          | 1                             |
| [22]  | Y   | Y   | Y   | N   | N  | Y   | Y   | NA  | Y   | N    | 66.6 | Moderate     | 1,2                           |

|      |   |   |   |   |   |   |   |    |   |   |      |          |         |
|------|---|---|---|---|---|---|---|----|---|---|------|----------|---------|
| [42] | Y | Y | Y | N | N | Y | N | NA | Y | N | 55.5 | Moderate | None    |
| [47] | N | Y | Y | Y | Y | Y | Y | NA | Y | Y | 88.8 | Low      | 1,2     |
| [23] | N | Y | Y | N | N | Y | N | NA | Y | N | 44.4 | High     | None    |
| [48] | N | Y | Y | N | N | Y | N | NA | Y | Y | 55.5 | Moderate | 1,5,6   |
| [24] | Y | Y | Y | Y | Y | N | N | NA | Y | Y | 77.7 | Low      | 5       |
| [45] | Y | Y | Y | N | N | Y | Y | NA | Y | Y | 77.7 | Low      | 1,2,6   |
| [25] | N | Y | Y | N | N | Y | Y | NA | Y | N | 55.5 | Moderate | 1,2     |
| [50] | Y | Y | Y | N | N | Y | N | NA | Y | N | 55.5 | Moderate | 1,6     |
| [26] | N | Y | Y | N | N | Y | Y | NA | Y | Y | 66.6 | Moderate | 1,2,5   |
| [27] | Y | Y | Y | Y | N | Y | Y | NA | Y | N | 77.7 | Low      | 1,2     |
| [28] | Y | Y | Y | N | N | Y | N | NA | Y | N | 55.5 | Moderate | None    |
| [29] | Y | Y | Y | N | N | Y | N | NA | Y | Y | 66.6 | Moderate | 1,4,6   |
| [30] | Y | Y | Y | N | N | Y | Y | NA | Y | Y | 77.7 | Low      | 1,2,6   |
| [43] | Y | Y | Y | Y | Y | Y | N | NA | Y | N | 77.7 | Low      | 1,6     |
| [31] | Y | Y | Y | Y | Y | Y | Y | NA | Y | Y | 100  | Low      | 2       |
| [32] | N | Y | Y | Y | Y | Y | Y | NA | Y | Y | 88.8 | Low      | 1,2,5   |
| [49] | Y | Y | Y | Y | Y | Y | Y | NA | Y | Y | 100  | Low      | 1,2,4,6 |
| [46] | Y | Y | Y | Y | Y | Y | N | NA | Y | Y | 88.8 | Low      | 1,5     |
| [33] | Y | Y | Y | N | N | N | Y | NA | Y | N | 55.5 | Moderate | 1,2     |
| [34] | Y | Y | Y | N | N | N | N | NA | Y | N | 44.4 | High     | 1       |
| [35] | N | Y | Y | N | N | Y | Y | NA | Y | Y | 66.6 | Moderate | 1,2,5   |
| [51] | Y | Y | Y | N | N | Y | Y | NA | Y | N | 66.6 | Moderate | 1,2,5   |
| [36] | N | Y | Y | N | N | Y | Y | NA | Y | Y | 66.6 | Moderate | 2,4,5,6 |
| [37] | N | Y | Y | Y | Y | Y | Y | NA | Y | Y | 88.8 | Low      | All     |
| [38] | Y | Y | Y | N | N | Y | Y | NA | Y | Y | 77.7 | Low      | 2       |
| [39] | N | Y | Y | N | N | Y | Y | NA | Y | Y | 66.6 | Moderate | 2,6     |
| [40] | Y | Y | Y | Y | N | Y | Y | NA | Y | Y | 88.8 | Low      | 1,2,5   |

Y = Yes; N = No; U = Unclear; NA = Not applicable; REMARK, Reporting Recommendations for Tumor Marker Prognostic Studies. \*Percentage of the (yes) responses. The assessment questions were as follows: Q1. Were there clear criteria for inclusion in the case series?; Q2. Was the condition measured in a standard, reliable way for all participants included in the case series?; Q3. Were valid methods used for identification of the condition for all participants included in the case series?; Q4. Did the case series have consecutive inclusion of participants?; Q5. Did the case series have complete inclusion of participants?; Q6. Was there clear reporting of the demographics of the participants in the study?; Q7. Was there clear reporting of clinical information of the participants?; Q8. Were the outcomes or follow-up results of cases clearly reported?; Q9. Was there clear reporting of the presenting site(s)/clinic(s) demographic information?; Q10. Was the statistical analysis appropriate?
